# Supplementary material for: A theoretical study on pseudo Mott phase transition of vanadium dioxide
Source: Royal Society of Chemistry journal article supplement (doi:10.1039/d2cp04763b), 2022-12-12
Supplement: d2cp04763b1.pdf [file d2cp04763b1.pdf]

## Supporting information

### Theoretical study on pseudo Mott phase transition of vanadium dioxide

Jin-Yi Miao<sup>1</sup>, Wen-Xuan Wang<sup>1</sup>, Zhen-Yi Jiang<sup>1\*</sup>, Xiao-Dong Zhang<sup>1\*</sup>, Ji-Ming Zheng<sup>1</sup>, Aijun Du<sup>2\*</sup>

<sup>1</sup>Shaanxi Key Laboratory for Theoretical Physics Frontiers, Institute of Modern Physics, Northwest University, Xi'an 710069

<sup>2</sup>Centre for Materials Science, School of Chemistry and Physics, Science and Engineering Faculty, Queensland University of Technology, Gardens Point Campus, Brisbane QLD 4001, Australia.

Table S-1 Comparison of stability of spin-polarized and spin-unpolarized R and M<sub>1</sub> phases.

| $E(\text{eV})$ | spin-polarization (R) | spin-polarization (M <sub>1</sub> ) | spin-unpolarization (R) | spin-unpolarization (M <sub>1</sub> ) |
|----------------|-----------------------|-------------------------------------|-------------------------|---------------------------------------|
| $U=2$          | -151.49               | -151.33                             | -150.72                 | -150.93                               |
| $U=0$          | -144.52               | -144.62                             | -142.59                 | -143.21                               |

#### Potential energy surface with linear interpolation

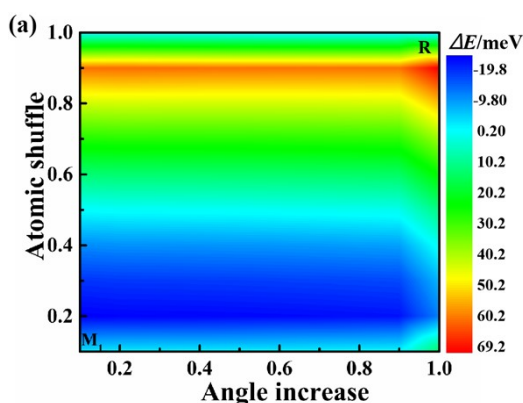

Figure S-1 Potential energy surface of cell shear from M<sub>1</sub> to R phase.

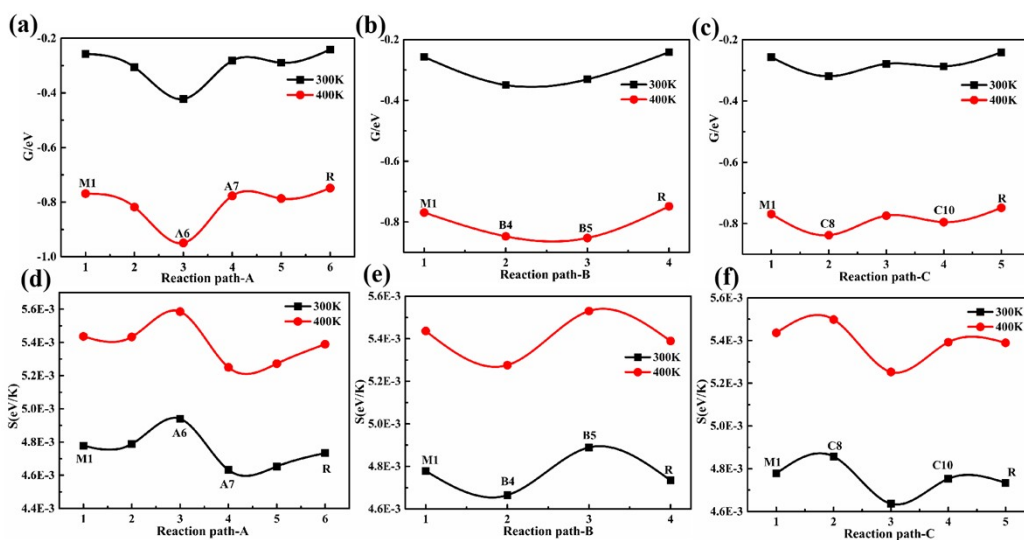

Figure S-2 Free energies and vibrational entropies of several structures at 300 and 400 K along the path A, B and C.

## Evolution of electronic and geometrical structure

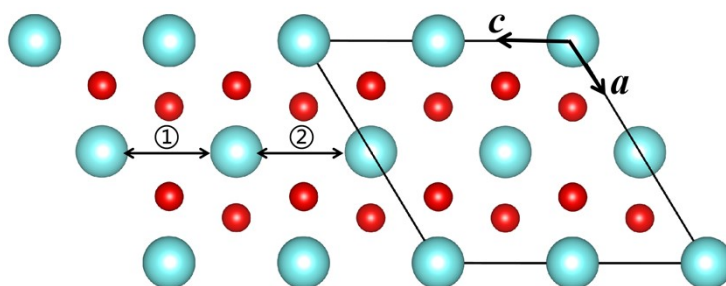

Figure S-3 Variation of V-V distances. Red spheres represent oxygen atoms while the others represent vanadium atoms.

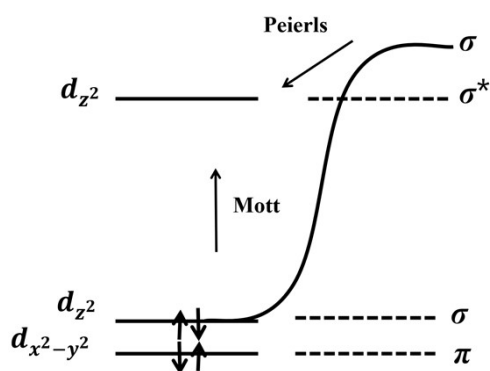

Figure S-4 Schematic diagram of electron orbitals for Peierls transition and Mott transition.

## From hole to electron carriers

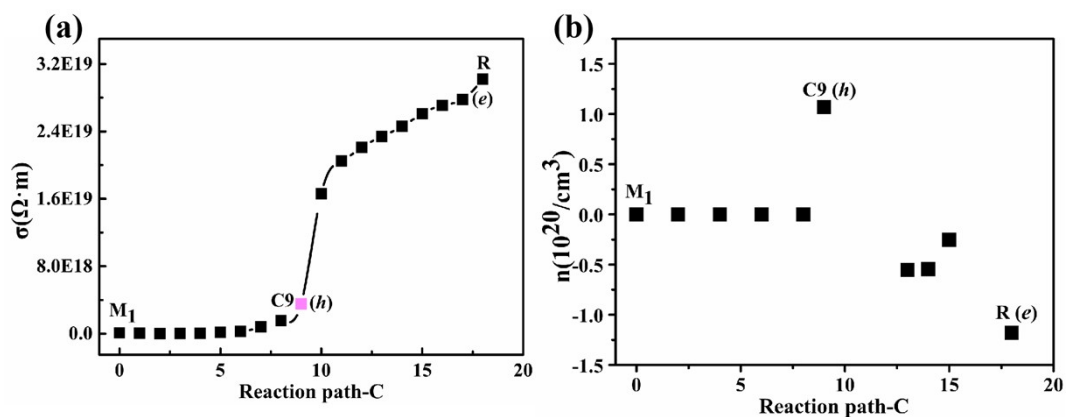

Figure S-5 Theoretical conductivity (a) and carrier concentrations (b) along the path C.
